# Supplementary material for: Low temperature growth of hybrid ZnO/TiO2 nano-sculptured foxtail-structures for dye-sensitized solar cells
Source: Royal Society of Chemistry journal article supplement (doi:10.1039/c4ra11881b), 2014-01-01
Supplement: c4ra11881b1.pdf [file c4ra11881b1.pdf]

## Supporting Information

### **Low temperature growth of hybrid ZnO/TiO<sub>2</sub> nano-sculptured foxtail-structures for dye-sensitized solar cells**

Chao. Zhao <sup>a</sup>, David. Child <sup>a</sup>, Yue. Hu <sup>b</sup>, Neil. Robertson <sup>b</sup>, Des. Gibson <sup>a, c</sup>, Shun. Cai. Wang <sup>d</sup> and Yong.Qing. Fu <sup>a, \*</sup>

<sup>a</sup> Thin Film Centre, Scottish Universities Physics Alliance (SUPA), University of the West of Scotland, Paisley, PA1 2BE, UK.

<sup>b</sup> EaStCHEM School of Chemistry, University of Edinburgh, King's Buildings, Edinburgh, EH9 3JJ

<sup>c</sup> Thin Film Solutions Ltd, Block 7, West of Scotland Science Park, Kelvin Campus, Maryhill Rd, Glasgow G20 0SP, UK.

<sup>d</sup> School of Engineering and the Environment, University of Southampton, Highfield, Southampton, SO17 1BJ, UK.

\* Corresponding author: Dr. Richard Y. Q. Fu, e-mail: [richard.fu@uws.ac.uk](mailto:richard.fu@uws.ac.uk)

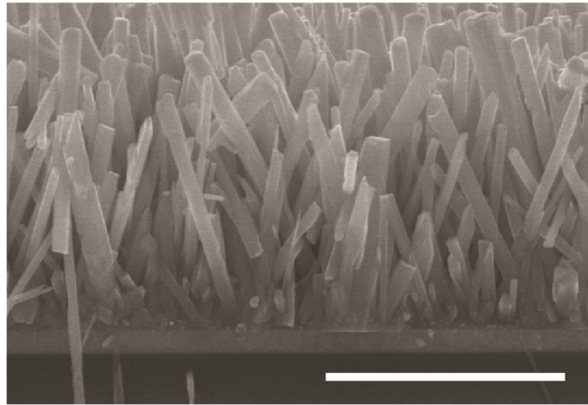

Figure S-1. Cross-sectional SEM image of the bare-ZnO NRs obtained after 4hrs growth (Z0). Scale bar is 3 $\mu$ m.

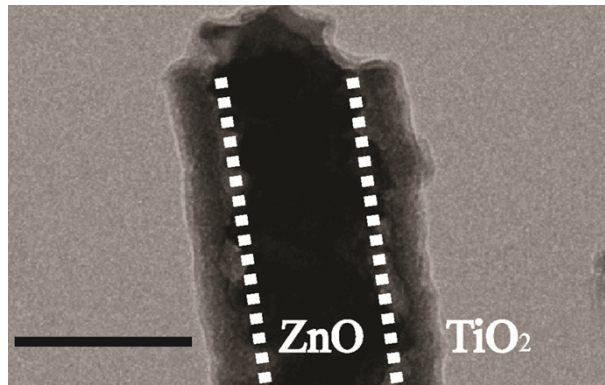

Figure S-2. TEM image of a single ZnO core-TiO<sub>2</sub> shell hybrid structure with the modification time of 120mins (TZ4). Scale bar is 200nm. The thickness of the shell is around 55nm

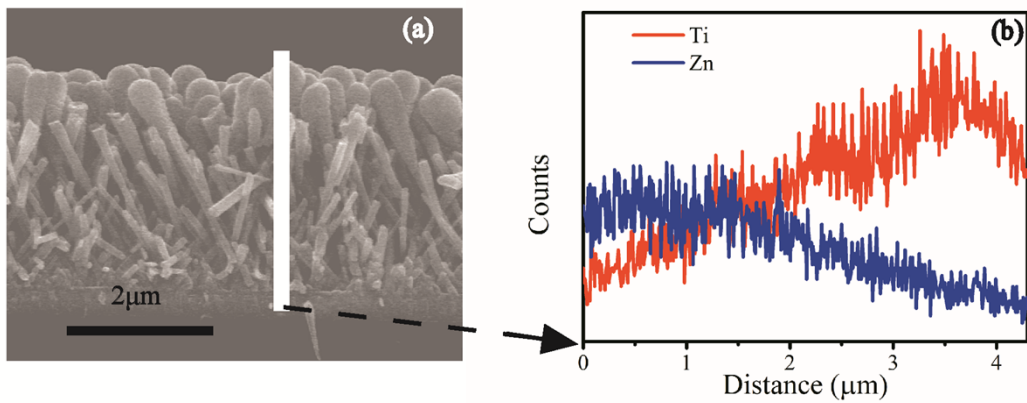

Figure S-3. (a) Cross section of the TZ4 and (b) the corresponding EDS line scan

## Impedance spectra

Equivalent circuit used to fit EIS results are followed by previous studies [1,2,3]. The fitting was achieved by zview software (Scribner Associates, Inc.) using non-linear least squares regression. Constant phase elements (CPEs) are used to replace all capacitances to improve quality of fits. However, the EIS results do not show a clear transmission-line feature in this experiment, which is commonly attributed to a good electron transport in the semiconductor oxide (i.e. ZnO) [4,5]. For this reason, it is not possible to extract reliable values from the equivalent circuit-fitting and we limited our study to analyse the recombination behavior of the NRs and hybrid nanostructures.

The details of the circuit are:

$R_s$ : series resistance, including the sheet resistance of TCO glass and contact resistance of the cell

$R_{co}$ : resistance at ITO/seed layer/nanostructure contact

$C_{CO}$ : the capacitance at ITO/seed layer/nanostructure contact

$R_{ct}$  &  $C_{ct}$ : the charge-transfer resistance and the corresponding double-layer capacitance at exposed ITO/electrolyte interface

$r_t$ : the transport resistance of electrons in ZnO/TiO<sub>2</sub> nanostructure

$r_{ct}$ : charge-transfer resistance of the charge recombination process

$C_{\mu}$ : the capacitance of the nanostructure/electrolyte interface

$R_{Pt}$ : charge-transfer resistance at the counter electrode (Pt coated ITO)

$C_{Pt}$ : double-layer capacitance at the counter electrode (Pt coated ITO)

$Z_d$ : Warburg element showing the Nernst diffusion of I<sub>3</sub><sup>-</sup> in electrolyte

## Electron transport

Measurements of electron transport time followed procedures reported in Ref. [6]. A square-wave pulse was applied to a white-light LED, used to illuminate the DSSCs. The modulation amplitude produced a <10% change in DSSC current. The current was determined by ohm law and an average of 5 photocurrent transient signals was recorded for each test.

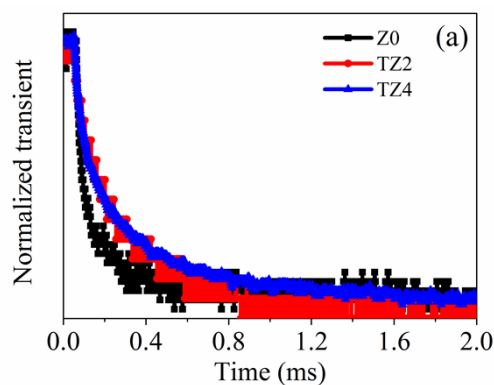

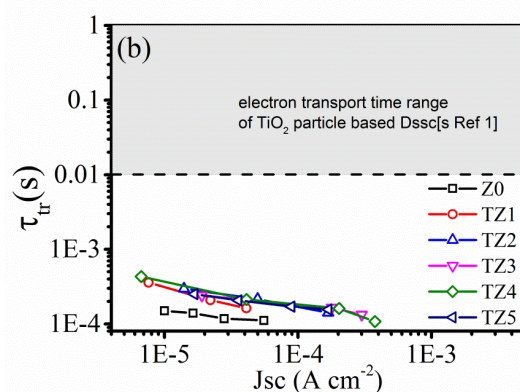

Figure S-4. (a) Representative transient photo current decay at a short circuit work condition of Z0, TZ2 and TZ4 (b) Fitted electron transport time constants ( $\tau_{tr}$ ) versus short circuit current for all the samples.

Fig. S-4(a) shows representative transient photo current decay at a short circuit work condition for Z0, TZ2, and TZ4. Each transient is fitted by the following equation:

$$y = y_0 + Ae^{-t/\tau_{tr}}$$

where  $\tau_{tr}$  is the characteristic time for electron transport. The values of characteristic time for  $\tau_{tr}$  under a range of light intensities are plotted against the corresponding short-circuit current density  $J_{sc}$  in Fig. S-4(b).

<sup>1</sup> J. Bisquert, *J. Phys. Chem. B*, 2002, **106**, 325-333

<sup>2</sup> F. Fabregat-Santiago, J. Bisquert, E. Palomares, L. Otero, D. Kuang, S. M. Zakeeruddin and M. Grätzel, *J. Phys. Chem. C*, 2007, **111**, 6550-6560.

<sup>3</sup> P. R. F. Barnes, K. Miettunen, X. Li, A. Y. Anderson, T. Bessho, M. Gratzel and B. C. O'Regan, *Adv. Mater.*, 2013, **25**, 1881-1922.

<sup>4</sup> F. Fabregat-Santiago, J. Bisquert, G. Garcia-Belmonte, G. Boschloo and A. Hagfeldt, *Sol. Energy Mater. Sol. Cells*, 2005, **87**, 117-131.

<sup>5</sup> E. Guillen, E. Azaceta, L. M. Peter, A. Zukal, R. Tena-Zaera and J. A. Anta, *Energy Environ. Sci.*, 2011, **4**, 3400-3407.

<sup>6</sup> V. Manthina, J. P. Correa Baena, G. Liu and A. G. Agrios, *J. Phys. Chem. C*, 2012, **116**, 23864-23870.
